# Supplementary material for: RNA-binding protein RBM3 intrinsically suppresses lung innate lymphoid cell activation and inflammation partially through CysLT1R
Source: PubMed Central journal article supplement (PMC9338970; doi:10.1038/s41467-022-32176-5), 2022-07-30
Supplement: 41467_2022_32176_MOESM1_ESM.pdf [file 41467_2022_32176_MOESM1_ESM.pdf]

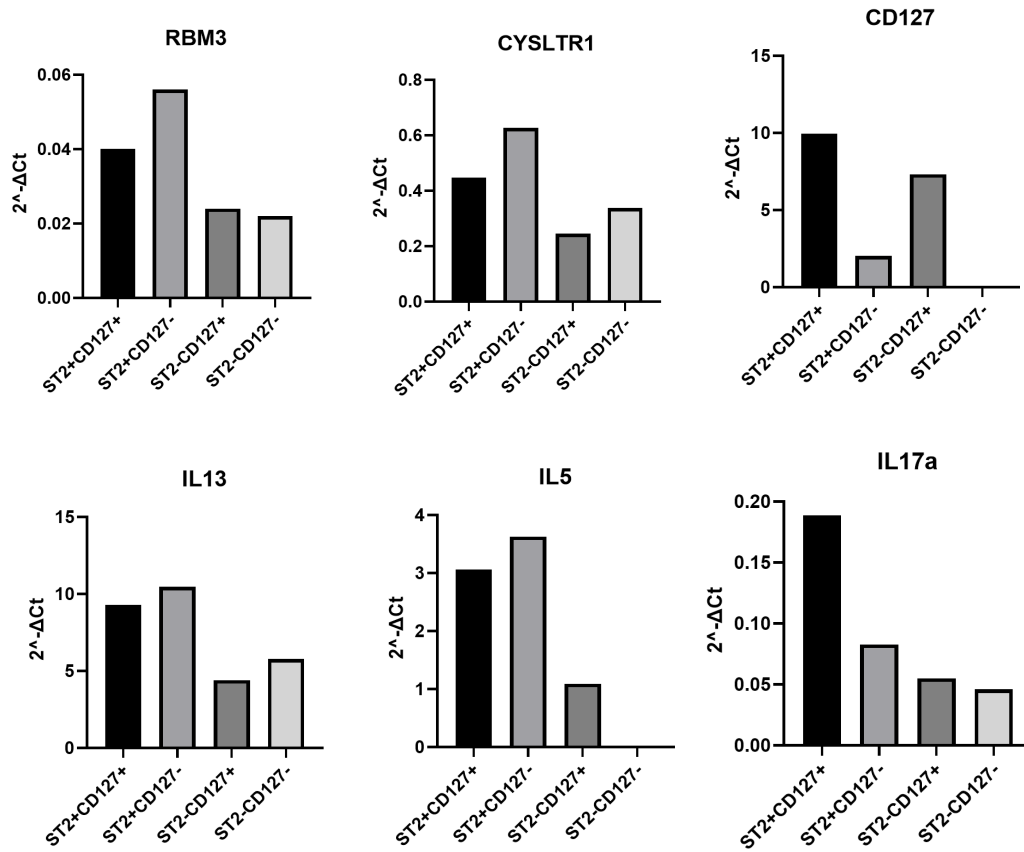

**Supplementary Figure 2.** Wild-type mice were challenged with *Alternaria* four times over 10 days. Lin<sup>-</sup>Thy1.2<sup>+</sup> ILCs were FACS-sorted based on ST2 and CD127 expression. mRNA levels for RBM3 and select surface receptors and cytokines were compared across the four subsets.

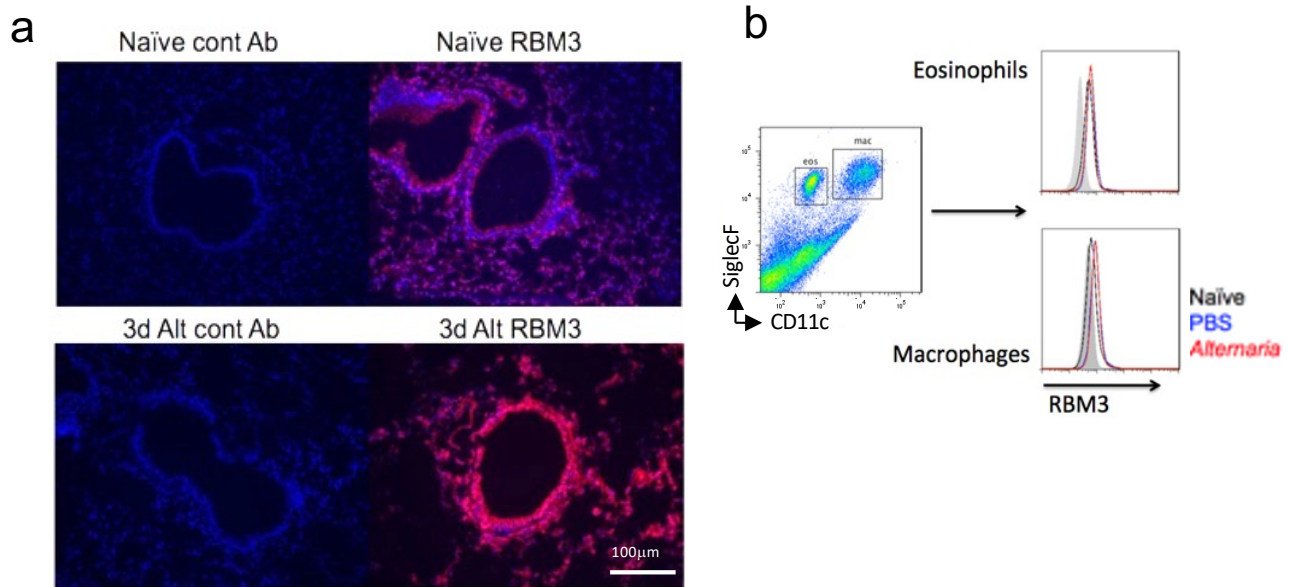

**Supplementary Figure 3. RBM3 is expressed on multiple immune and non-immune cells within the airway.** (a) RBM3 expression on macrophages and eosinophils from naïve, PBS challenged, or *Alternaria* challenged lung. Black = Naïve, Blue = PBS challenged, Red = *Alternaria* challenged (24 hour). (b) Immunofluorescence of RBM3 expression in airways of naïve and *Alternaria* challenged mice. Cell nuclei were stained with DAPI. Images were taken from at least 5 airways of at least 3 mice.

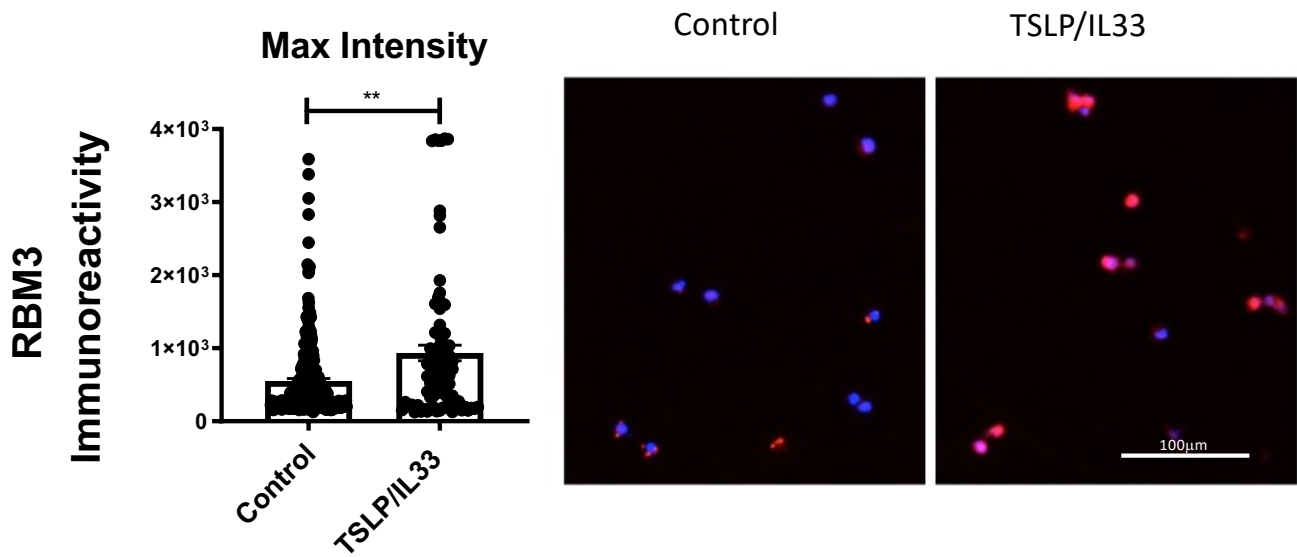

**Supplementary Figure 4. RBM3 expression is upregulated in human blood ILC2s after stimulation with IL33 and TSLP.** Human ILC2s were cultured and treated with TSLP and IL-33 before being fixed with 4% PFA and processed for immunocytochemistry using an RBM3 antibody (at 1:2000) and a Cy3 secondary antibody. Cells were also stained for DAPI. Images were taken at 20X. Immunopositive elements were captured and analyzed by thresholding the intensity histogram in the Cy3 channel at 100. Maximum intensity was quantified after 24 hours of stimulation ( $p = 0.0057$ ). Data for objects of 50-175 pixels were included ( $n = 283$  for controls and  $n = 87$  for TSLP/IL-33 group). Immunostaining shown after 72 hours of stimulation. Mann-Whitney Test, two-tailed. \*\*  $p < 0.01$ . Data are presented as mean values  $\pm$  SEM.

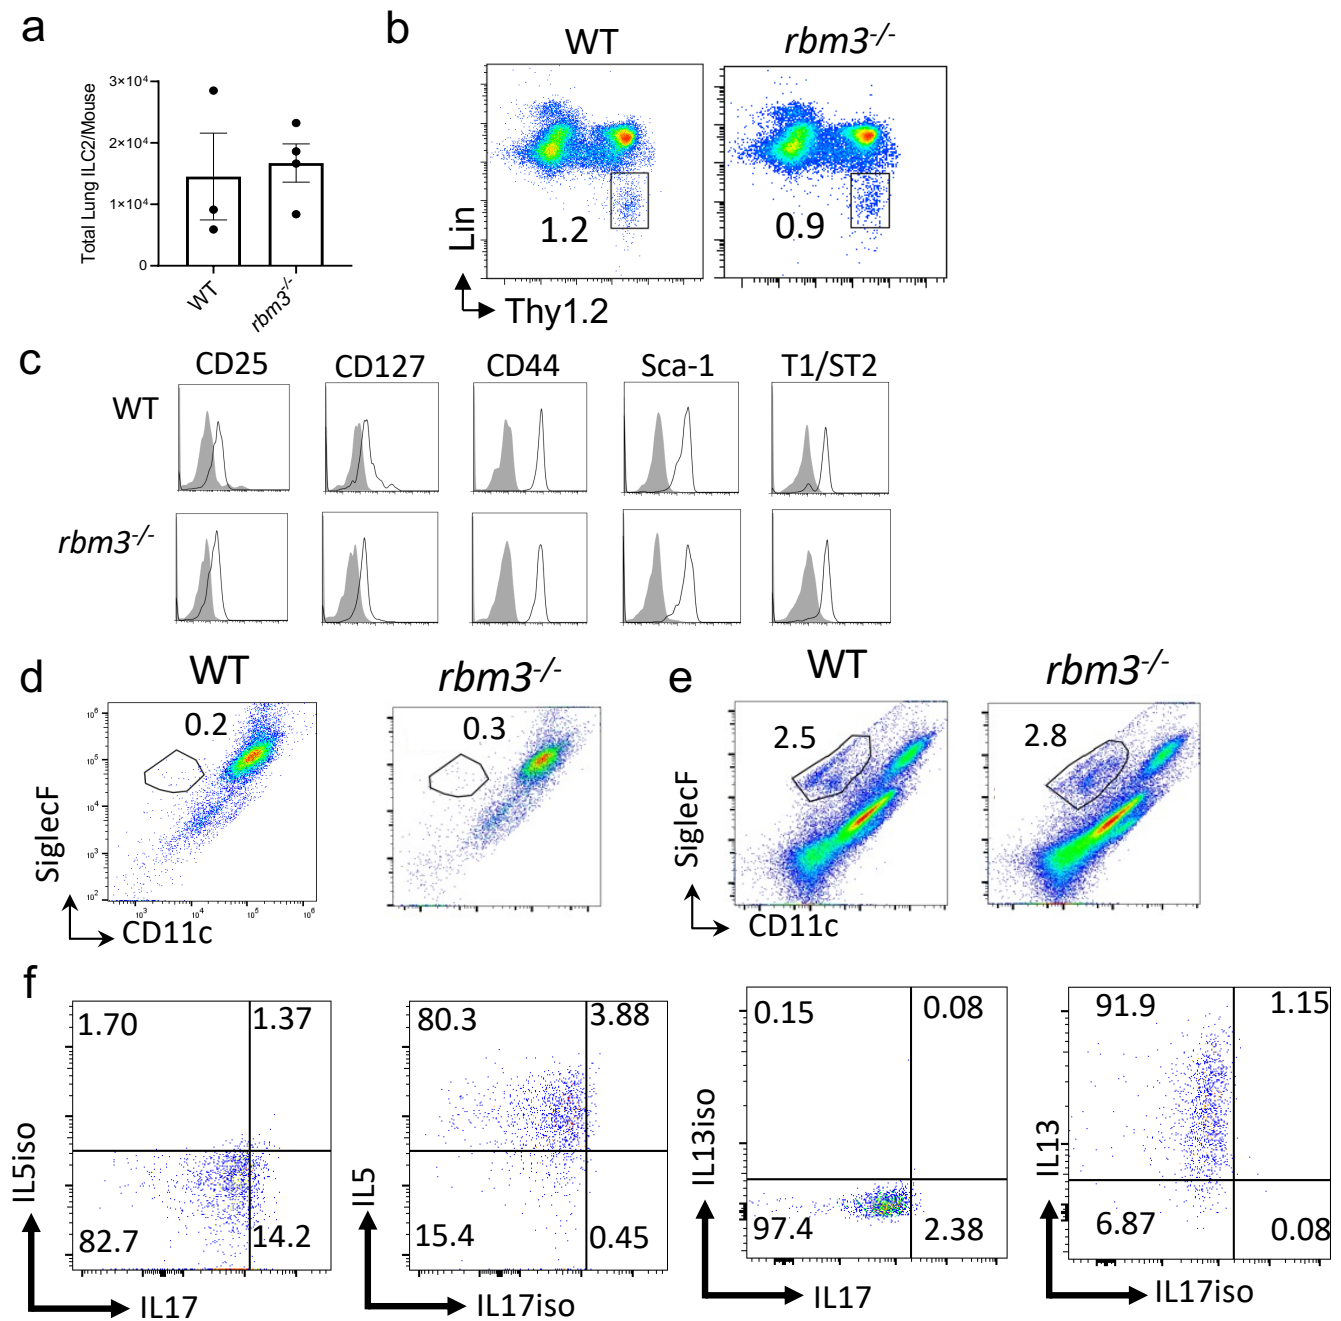

**Supplementary Figure 5. Naive  $rbm3^{-/-}$  mice do not have significant changes in ILC2 numbers, ILC2 surface marker expression, or eosinophilia.** Naive wild-type and  $rbm3^{-/-}$  lungs were stained for ILCs and eosinophils. (a) Total lung ILCs ( $p = 0.7638$ ). Data representative of 3-4 mice. Unpaired t-test, two-tailed. (b) Representative FACS plots of Lin<sup>+</sup>Thy1.2<sup>+</sup> ILCs. (c) Histograms of surface marker expression on naive lung ILCs. Grey = Isotype control. Representative FACS plots of naive (d) BAL eosinophils and (e) lung eosinophils are shown. (f) Isotype staining for IL-5 vs IL-17 and IL-5 vs IL-13 in Lin<sup>+</sup>Thy1.2<sup>+</sup> lymphocytes from *Alternaria*-challenged mice in Fig. 3E. Data are presented as mean values  $\pm$  SEM.

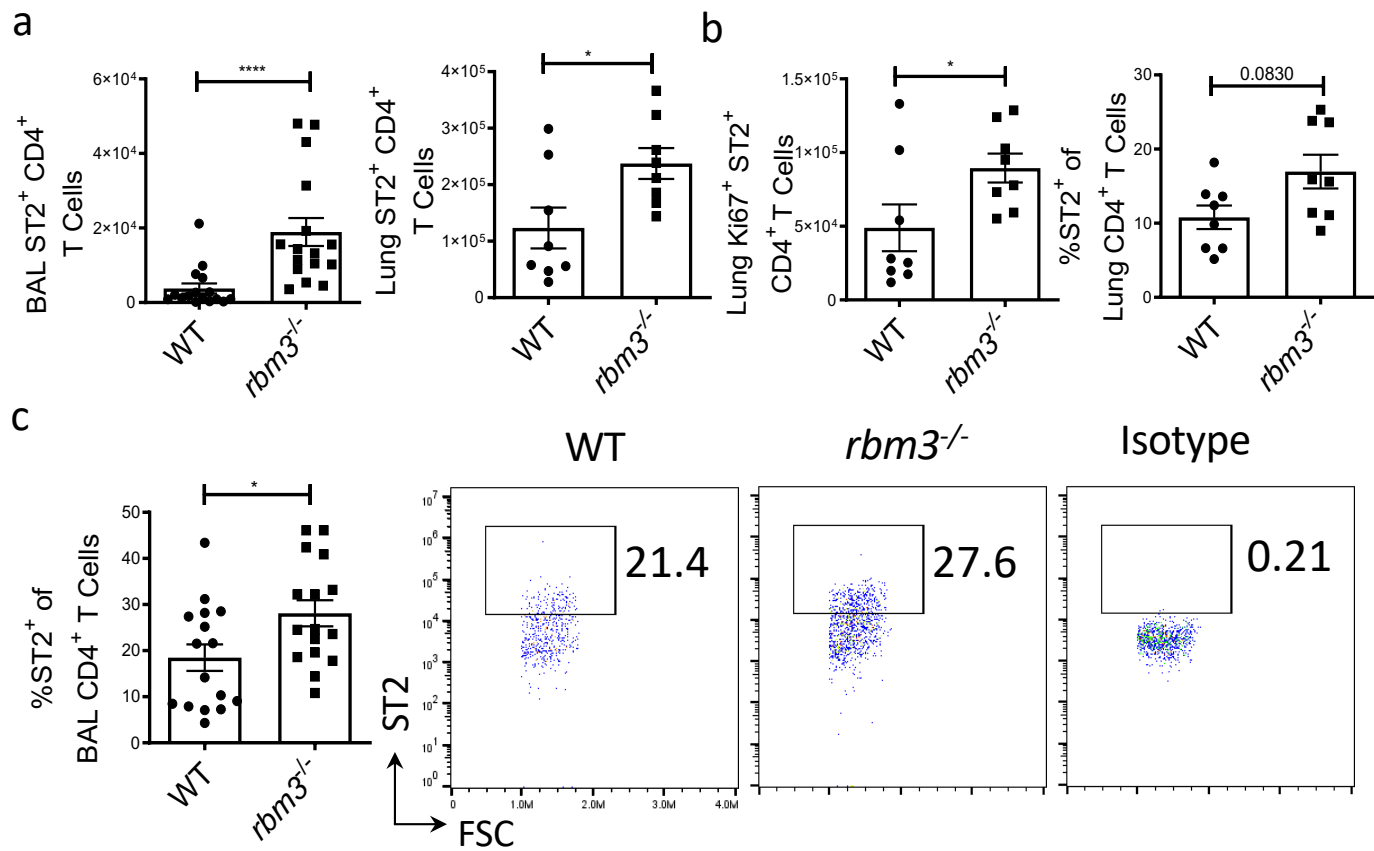

**Supplementary Figure 6. *Alternaria*-challenged *rbm3*<sup>-/-</sup> mice show an increased Th2 cell response.** Mice were challenged with 20 $\mu$ g and 10 $\mu$ g *Alternaria* for 10 days. (a) Total BAL ( $p < 0.0001$ ) and lung ( $p = 0.0379$ ) Th2 cells. Th2 cells were identified as CD4<sup>+</sup>T1ST2<sup>+</sup> lymphocytes. Data representative of 16 mice. (b) Total Ki-67 expressing lung Th2 cells ( $p = 0.0499$ ) and percentage of T1ST2 expression ( $p = 0.0830$ ) on lung CD4<sup>+</sup> T cells. Data representative of 16 paired lungs (generating 8 samples). (c) Percentage of T1ST2 expression on BAL CD4<sup>+</sup> T cells ( $p = 0.0280$ ). Representative FACS plots of T1ST2 percentages and isotype control. Data representative of 16 mice. \*  $p < 0.05$ , \*\*  $p < 0.01$ , \*\*\*  $p < 0.001$ , \*\*\*\*  $p < 0.0001$ , Mann Whitney test, two-tailed. Data are presented as mean values +/- SEM.

a

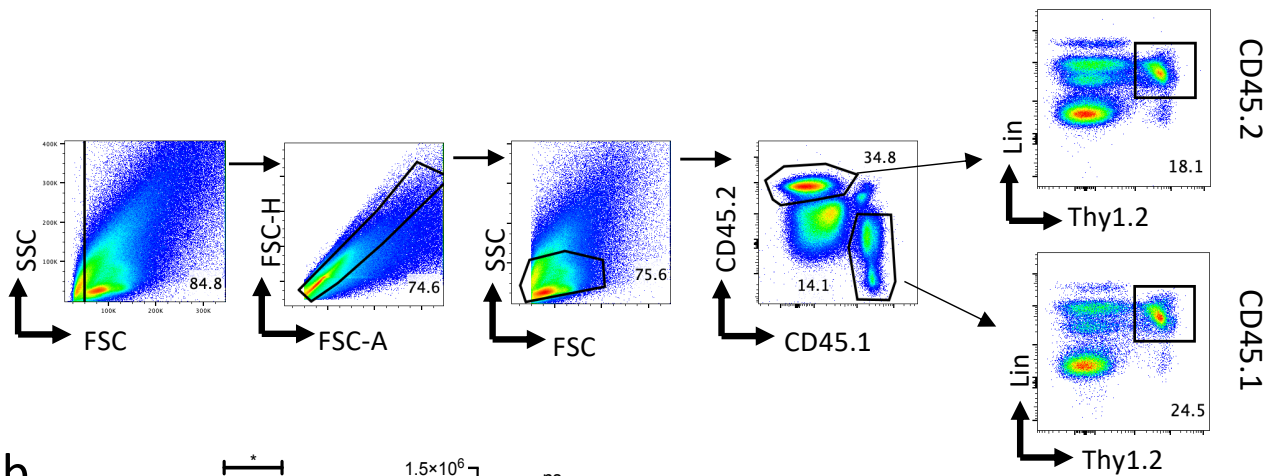

b

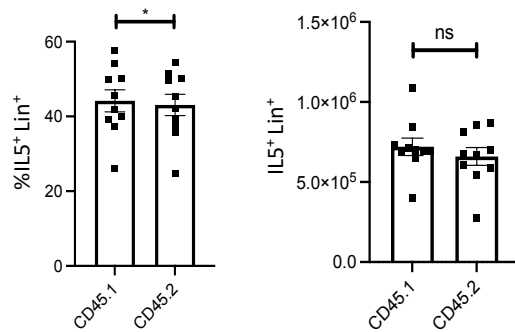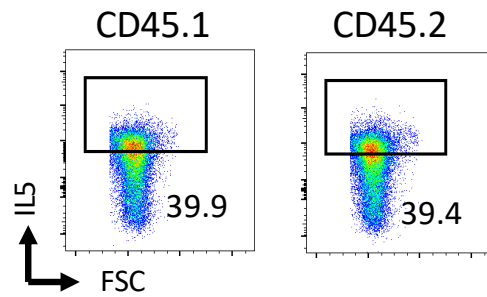

c

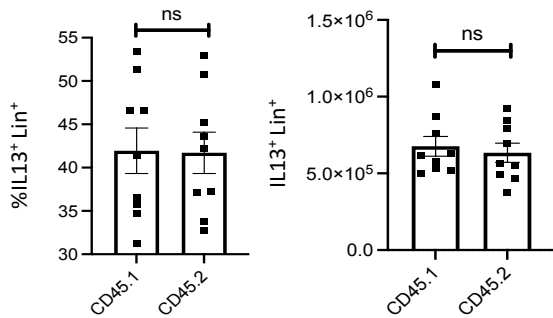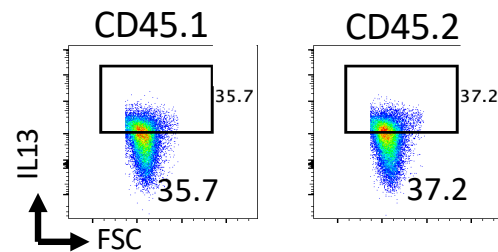

d

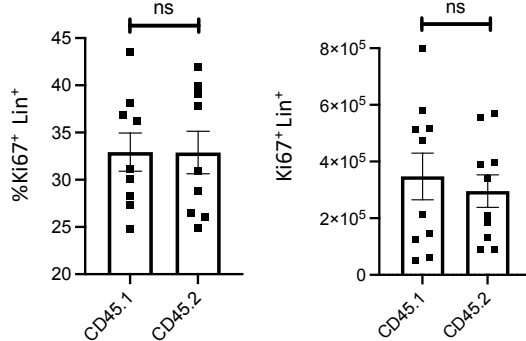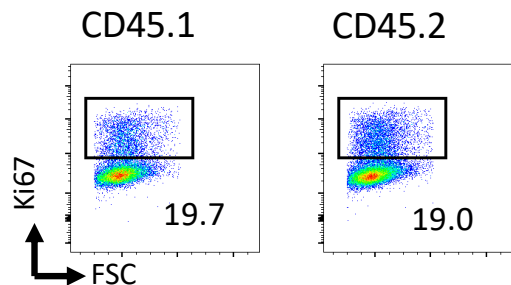

**Supplementary Figure 7. Lineage<sup>+</sup>Thy1.2<sup>+</sup> cells show no differences in type 2 cytokine production or Ki67 expression in mixed bone marrow chimeras** (a) Mixed bone marrow chimera mice were challenged 3 times over 7 days with 20 $\mu$ g *Alternaria*. FACS plots are representative of 2 independent experiments (5 mice each) with biological controls. Adaptive cells gated as lineage<sup>+</sup>Thy1.2<sup>+</sup>. (b) Percent ( $p=0.0151$ ) and total IL5 ( $p=0.1896$ ) expressing lineage<sup>+</sup> cells from WT vs. *rbm3*<sup>-/-</sup> mice. FACS plots of IL5 percentages. (c) Percent ( $p=0.6466$ ) and total IL13 ( $p=0.3425$ ) expressing lineage<sup>+</sup> cells from WT vs. *rbm3*<sup>-/-</sup> mice. Representative FACS plots of IL13 percentages. (d) Percent ( $p=0.9844$ ) and total Ki67 ( $p=0.1374$ ) expressing lineage<sup>+</sup> cells from WT vs *rbm3*<sup>-/-</sup> mice. Representative FACS plots of Ki67 percentages. Paired t-Test, two-tailed. \* $p<0.05$ , \*\* $p<0.005$ , \*\*\* $p<0.0005$ .

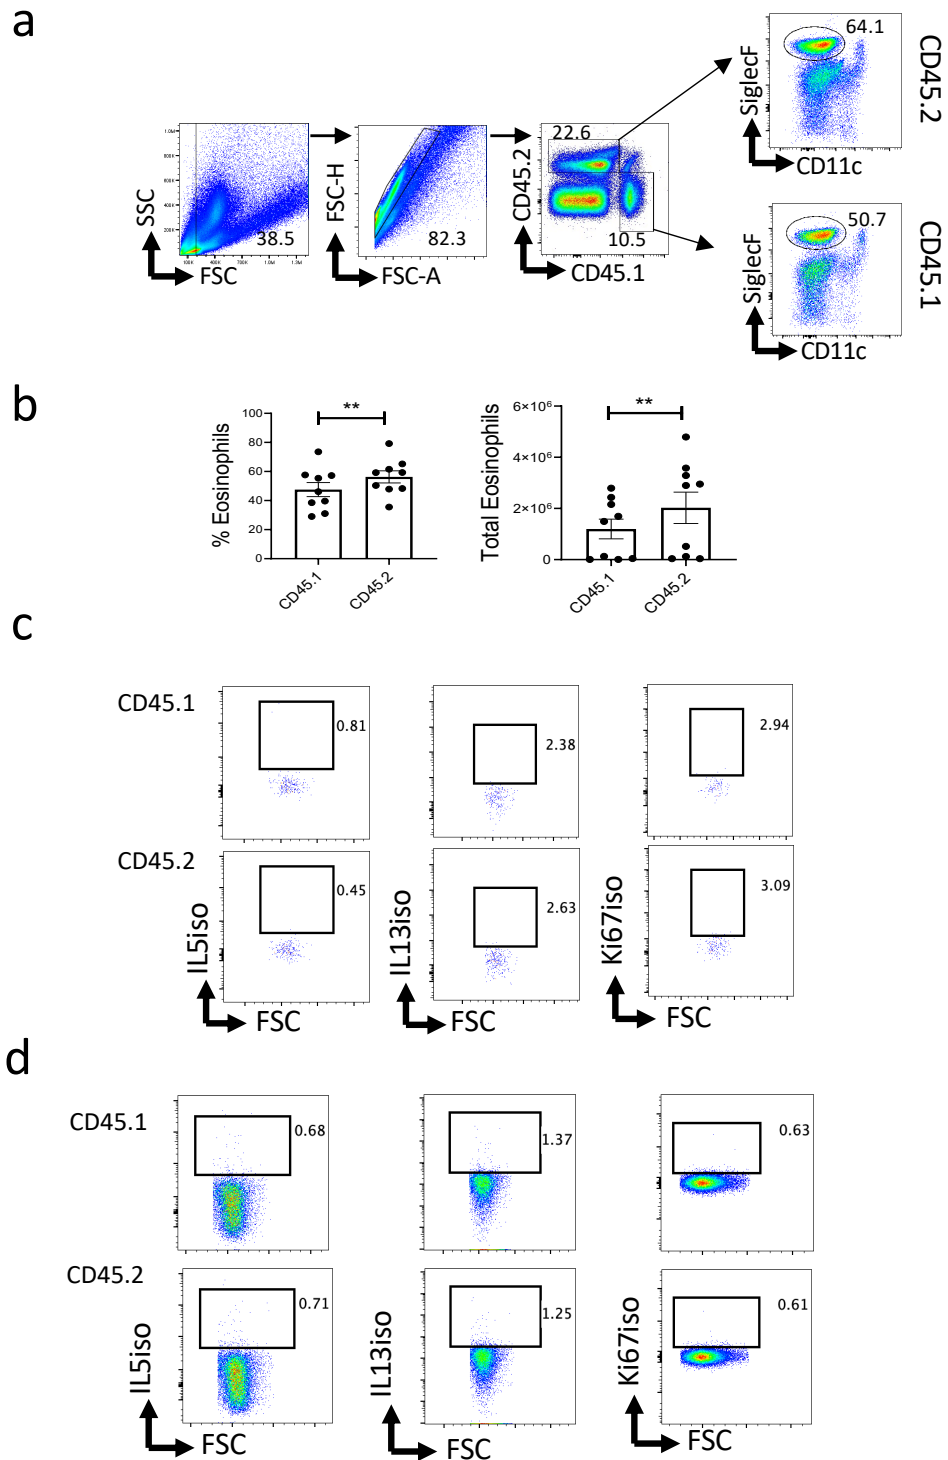

**Supplementary Figure 8. Intrinsic differences in eosinophils from *rbm3*<sup>-/-</sup> mixed chimeric mice and lymphocyte isotypes.** Airway eosinophils were gated (a) on CD45.1 or CD45.2 (*rbm3*<sup>-/-</sup>) and assessed for eosinophils as Siglec-F<sup>+</sup>CD11c<sup>-</sup> (b),  $p=0.0023$  and  $0.0093$ , respectively. Paired t-Test. Representative of 2 independent experiments (5 mice each,  $n=9$  as one mouse was omitted).  $**p<0.005$ . Isotype staining for IL-5, IL-13, Ki-67 from CD45.1 and CD45.2 ILCs (c) and Th2 cells (d). Data are presented as mean values  $\pm$  SEM.



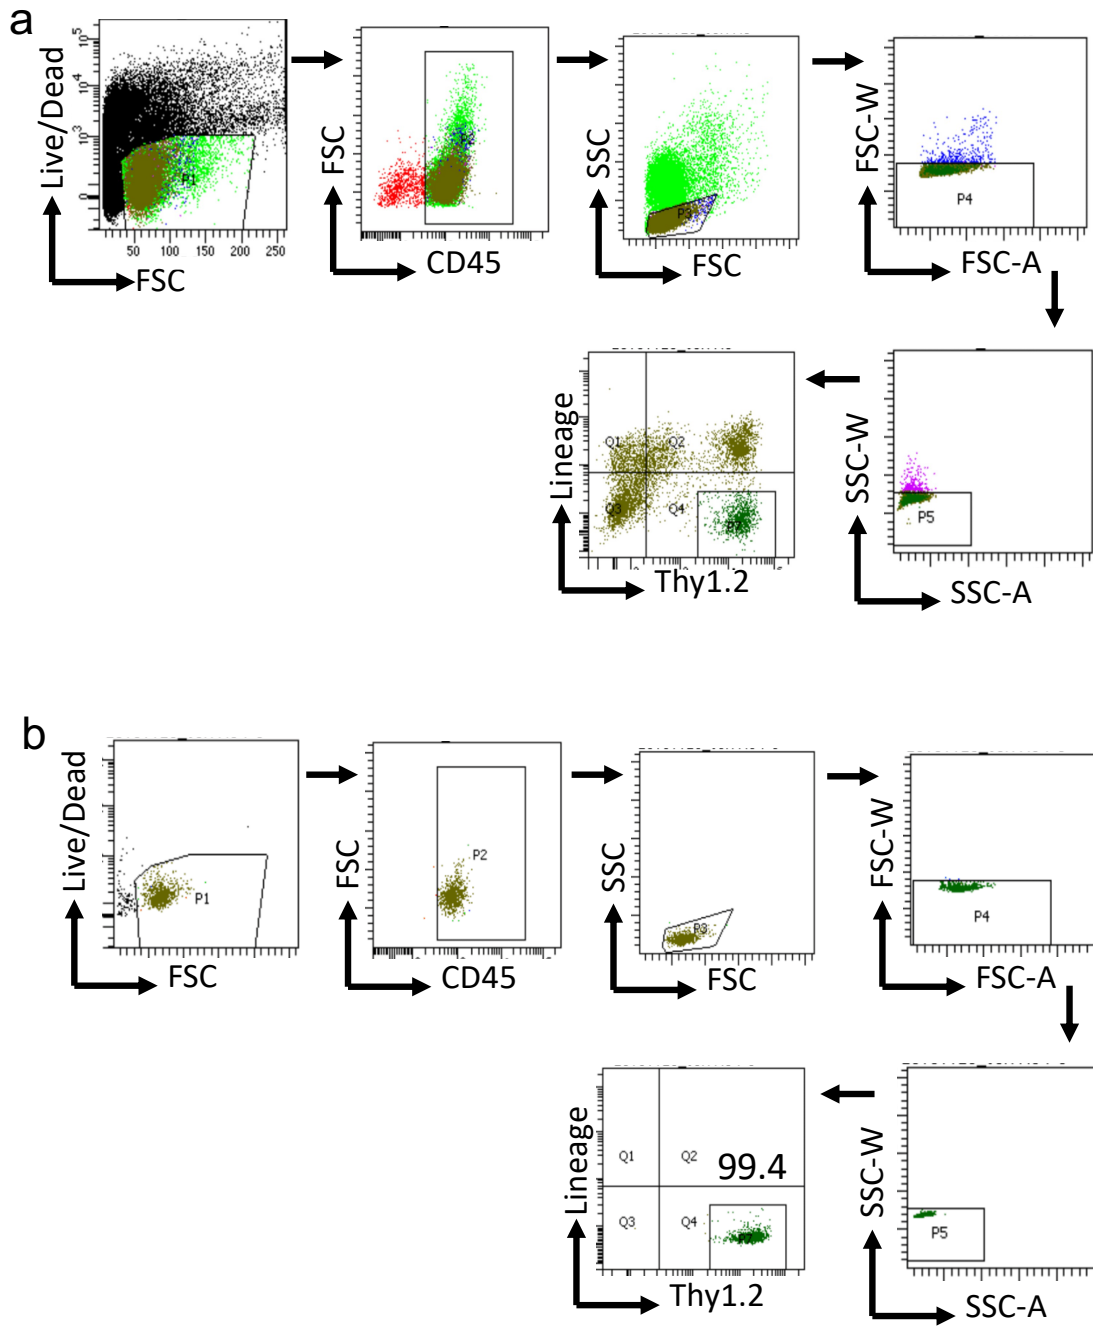

**Supplementary Figure 9. Purity of ILCs from *Alternaria*-challenged WT and *rbm3*<sup>-/-</sup> mice FACS-sorted for RNA-seq analysis.** WT and *rbm3*<sup>-/-</sup> mice were challenged with 25  $\mu$ g *Alternaria* three times over 7 days. Lin<sup>-</sup>Thy1.2<sup>+</sup> ILCs were FACS-sorted and bulk RNA-sequenced. (a) Plots before sorting for Lin<sup>-</sup>Thy1.2<sup>+</sup> ILCs. (b) Post-sort plot demonstrating population purity.

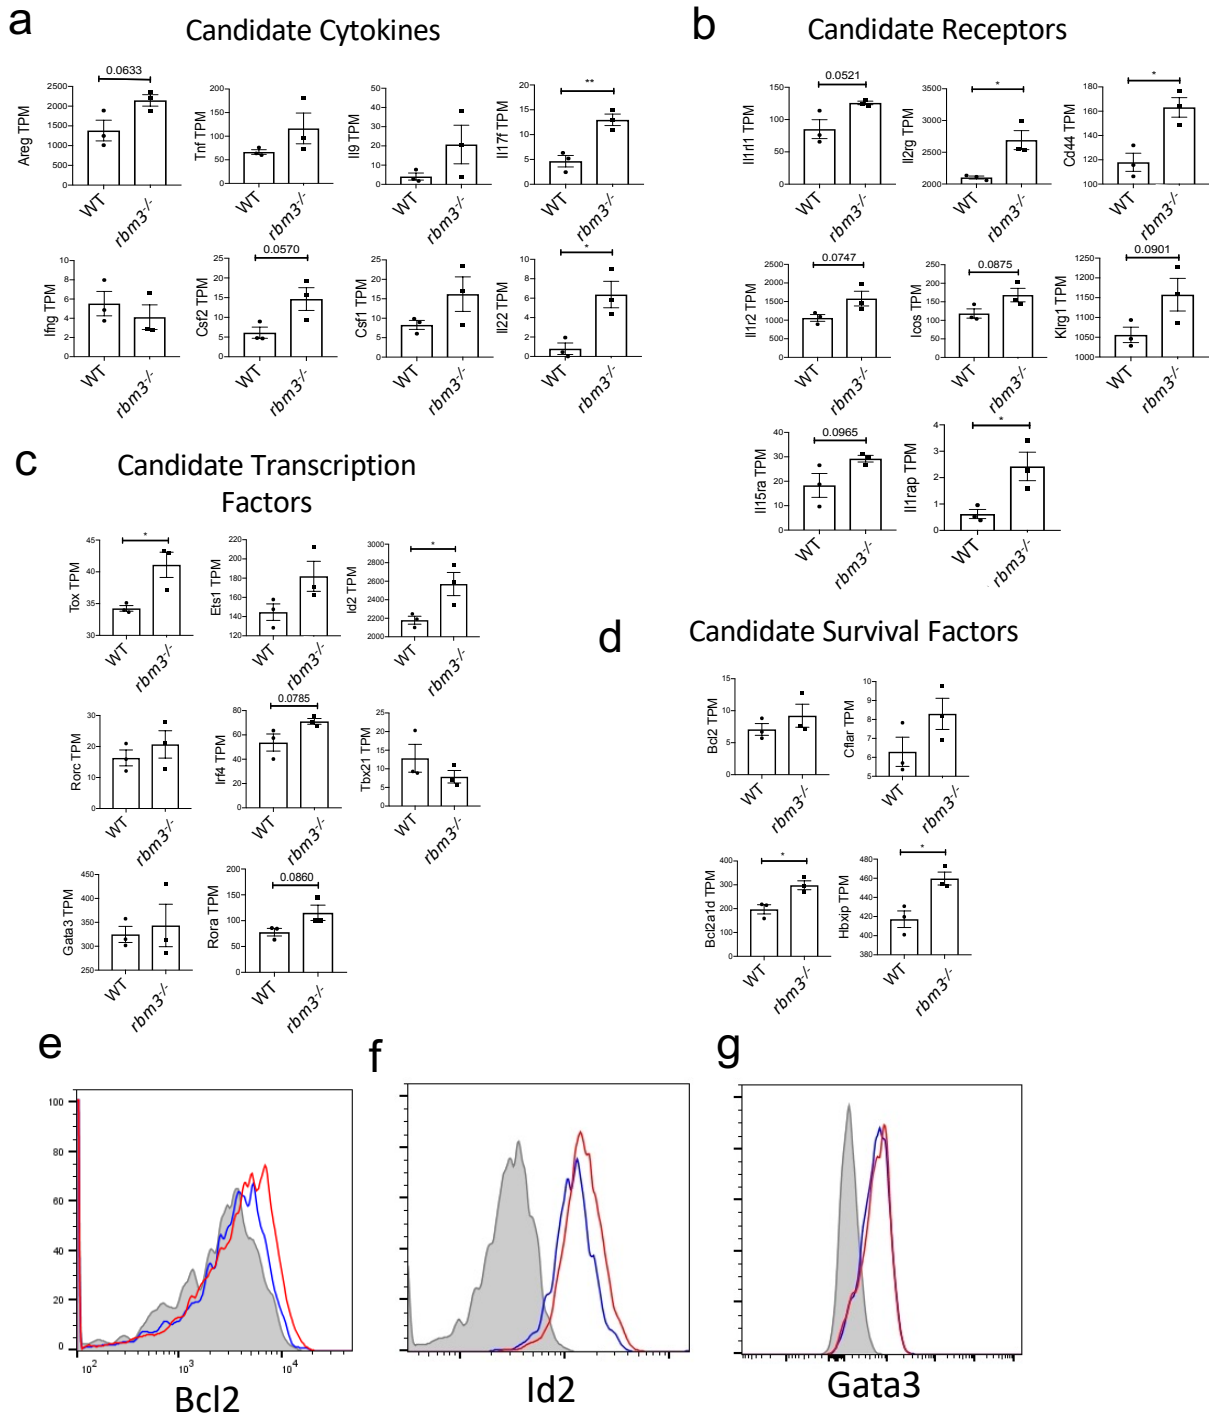

**Supplementary Figure 10. FACS-sorted *Alternaria*-challenged WT and *Rbm3*<sup>-/-</sup> ILCs demonstrate differentially expressed transcriptomes.** WT and *rbm3*<sup>-/-</sup> mice were challenged with 25  $\mu$ g *Alternaria* three times over 7 days. Lin<sup>-</sup>Thy1.2<sup>+</sup> ILCs were FACS-sorted and bulk RNA-sequenced. Data representative of three mice per group. (a) Transcripts per million (TPMs) of select cytokine transcripts. Unpaired t-Test, two-tailed. (b) TPMs of select surface marker transcripts. Unpaired t-Test, two-tailed. (c) TPMs of select transcription factor transcripts. Unpaired t-Test, two-tailed. (d) TPMs of select transcripts involved in apoptosis. Unpaired t-test, two-tailed. WT and *rbm3*<sup>-/-</sup> mice were challenged with 25  $\mu$ g *Alternaria* three times over 7 days. Data representative of 4 mice per group. (e) Histogram of Bcl2 expression. (f) Histogram of Id2 expression. (g) Histogram of GATA3 expression. Blue = WT. Red = *Rbm3*<sup>-/-</sup>. Grey = isotype control. Unpaired t-Test, two-tailed. \* p < 0.05, \*\* p < 0.01, \*\*\* p < 0.001. Data are presented as mean values +/- SEM.

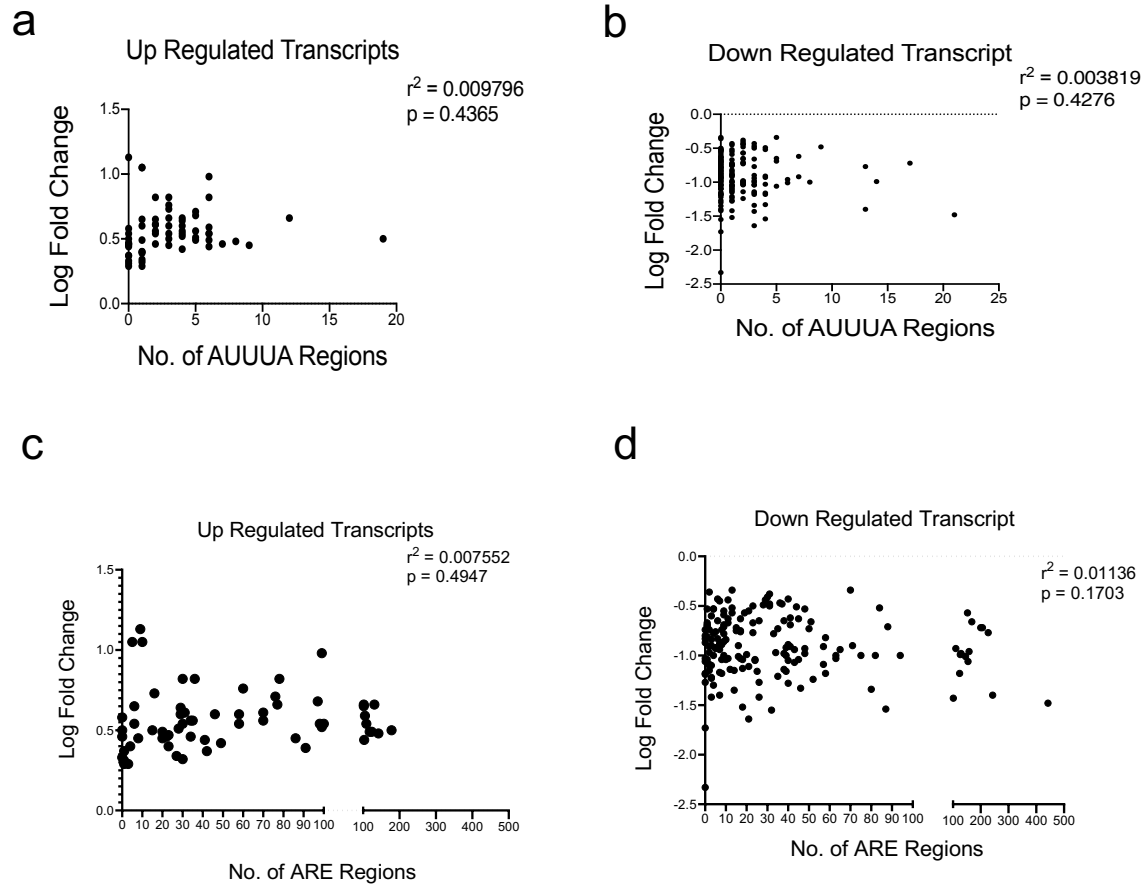

**Supplementary Figure 11. Log fold change of differentially expressed transcripts of WT and *rbm3*<sup>-/-</sup> ILCs compared to the number of AUUUA or total number of ARE regions.** WT and *rbm3*<sup>-/-</sup> mice were challenged with 25  $\mu$ g *Alternaria* three times over 7 days. Lin<sup>+</sup>Thy1.2<sup>+</sup> ILCs were FACS-sorted and bulk RNA-sequenced. RBPs were divided into two categories based on whether they were up-regulated or down-regulated. Utilizing an AUUUA and ARE database (<http://nibiru.tbi.univie.ac.at/AREsite2/welcome>), the total number of regions were determined and compared to the log fold change in transcriptional regulation. Comparison of (a) up-regulated and (b) down-regulated transcripts to their total number of AUUUA regions. Comparison of (c) up-regulated and (d) down-regulated transcripts to their total number of ARE regions. Pearson correlation, two-tailed.
