# Supplementary material for: RNA-binding protein RBM3 intrinsically suppresses lung innate lymphoid cell activation and inflammation partially through CysLT1R
Source: PubMed Central journal article supplement (PMC9338970; doi:10.1038/s41467-022-32176-5), 2022-07-30
Supplement: 41467_2022_32176_MOESM4_ESM.pdf [file 41467_2022_32176_MOESM4_ESM.pdf]

## Reporting Summary

Nature Research wishes to improve the reproducibility of the work that we publish. This form provides structure for consistency and transparency in reporting. For further information on Nature Research policies, see our [Editorial Policies](#) and the [Editorial Policy Checklist](#).

### Statistics

For all statistical analyses, confirm that the following items are present in the figure legend, table legend, main text, or Methods section.

n/a Confirmed

- |                                     |                                     |                                                                                                                                                                                                                                                            |
|-------------------------------------|-------------------------------------|------------------------------------------------------------------------------------------------------------------------------------------------------------------------------------------------------------------------------------------------------------|
| <input type="checkbox"/>            | <input checked="" type="checkbox"/> | The exact sample size ( $n$ ) for each experimental group/condition, given as a discrete number and unit of measurement                                                                                                                                    |
| <input type="checkbox"/>            | <input checked="" type="checkbox"/> | A statement on whether measurements were taken from distinct samples or whether the same sample was measured repeatedly                                                                                                                                    |
| <input type="checkbox"/>            | <input checked="" type="checkbox"/> | The statistical test(s) used AND whether they are one- or two-sided<br><i>Only common tests should be described solely by name; describe more complex techniques in the Methods section.</i>                                                               |
| <input checked="" type="checkbox"/> | <input type="checkbox"/>            | A description of all covariates tested                                                                                                                                                                                                                     |
| <input checked="" type="checkbox"/> | <input type="checkbox"/>            | A description of any assumptions or corrections, such as tests of normality and adjustment for multiple comparisons                                                                                                                                        |
| <input checked="" type="checkbox"/> | <input type="checkbox"/>            | A full description of the statistical parameters including central tendency (e.g. means) or other basic estimates (e.g. regression coefficient) AND variation (e.g. standard deviation) or associated estimates of uncertainty (e.g. confidence intervals) |
| <input type="checkbox"/>            | <input checked="" type="checkbox"/> | For null hypothesis testing, the test statistic (e.g. $F$ , $t$ , $r$ ) with confidence intervals, effect sizes, degrees of freedom and $P$ value noted<br><i>Give <math>P</math> values as exact values whenever suitable.</i>                            |
| <input checked="" type="checkbox"/> | <input type="checkbox"/>            | For Bayesian analysis, information on the choice of priors and Markov chain Monte Carlo settings                                                                                                                                                           |
| <input checked="" type="checkbox"/> | <input type="checkbox"/>            | For hierarchical and complex designs, identification of the appropriate level for tests and full reporting of outcomes                                                                                                                                     |
| <input type="checkbox"/>            | <input checked="" type="checkbox"/> | Estimates of effect sizes (e.g. Cohen's $d$ , Pearson's $r$ ), indicating how they were calculated                                                                                                                                                         |

*Our web collection on [statistics for biologists](#) contains articles on many of the points above.*

### Software and code

Policy information about [availability of computer code](#)

Data collection

Data analysis

For manuscripts utilizing custom algorithms or software that are central to the research but not yet described in published literature, software must be made available to editors and reviewers. We strongly encourage code deposition in a community repository (e.g. GitHub). See the Nature Research [guidelines for submitting code & software](#) for further information.

### Data

Policy information about [availability of data](#)

All manuscripts must include a [data availability statement](#). This statement should provide the following information, where applicable:

- Accession codes, unique identifiers, or web links for publicly available datasets
- A list of figures that have associated raw data
- A description of any restrictions on data availability

Source data for all figures are provided with this paper as a supplement file. RNA-sequencing data of Rbm3<sup>-/-</sup> and WT ILCs is deposited in GEO database (GSE155330, <https://www.ncbi.nlm.nih.gov/geo/query/acc.cgi?acc=GSE155330>). ILC RNA-sequencing of ILCs based ST2 and CD127 are deposited in GEO database (GSE136156, <https://www.ncbi.nlm.nih.gov/geo/query/acc.cgi?acc=GSE136156>).

## Field-specific reporting

Please select the one below that is the best fit for your research. If you are not sure, read the appropriate sections before making your selection.

Life sciences  Behavioural & social sciences  Ecological, evolutionary & environmental sciences

For a reference copy of the document with all sections, see [nature.com/documents/nr-reporting-summary-flat.pdf](https://www.nature.com/documents/nr-reporting-summary-flat.pdf)

## Life sciences study design

All studies must disclose on these points even when the disclosure is negative.

|                 |                                                                                                                                                                             |
|-----------------|-----------------------------------------------------------------------------------------------------------------------------------------------------------------------------|
| Sample size     | Sample size was chosen based previous studies with mouse models of asthma showing statistical significance in asthma model and ILC endpoints. Individual data points shown. |
| Data exclusions | No data was excluded.                                                                                                                                                       |
| Replication     | All mouse work was replicated and shown.                                                                                                                                    |
| Randomization   | N/A                                                                                                                                                                         |
| Blinding        | N/A                                                                                                                                                                         |

## Reporting for specific materials, systems and methods

We require information from authors about some types of materials, experimental systems and methods used in many studies. Here, indicate whether each material, system or method listed is relevant to your study. If you are not sure if a list item applies to your research, read the appropriate section before selecting a response.

### Materials & experimental systems

| n/a                                 | Involved in the study                                           |
|-------------------------------------|-----------------------------------------------------------------|
| <input type="checkbox"/>            | <input checked="" type="checkbox"/> Antibodies                  |
| <input checked="" type="checkbox"/> | <input type="checkbox"/> Eukaryotic cell lines                  |
| <input checked="" type="checkbox"/> | <input type="checkbox"/> Palaeontology and archaeology          |
| <input type="checkbox"/>            | <input checked="" type="checkbox"/> Animals and other organisms |
| <input checked="" type="checkbox"/> | <input type="checkbox"/> Human research participants            |
| <input checked="" type="checkbox"/> | <input type="checkbox"/> Clinical data                          |
| <input checked="" type="checkbox"/> | <input type="checkbox"/> Dual use research of concern           |

### Methods

| n/a                                 | Involved in the study                              |
|-------------------------------------|----------------------------------------------------|
| <input checked="" type="checkbox"/> | <input type="checkbox"/> ChIP-seq                  |
| <input type="checkbox"/>            | <input checked="" type="checkbox"/> Flow cytometry |
| <input checked="" type="checkbox"/> | <input type="checkbox"/> MRI-based neuroimaging    |

## Antibodies

Antibodies used

Mouse antibodies  
 Vendor Antibody Clone Catalog Number Dilution  
 Biologend Purified anti-mouse CD16/32 93 101302 1:50  
 Biologend FITC Lineage anti-mouse 145-2C11 ; RB6-8C5 ; RA3-6B2 ; Ter-119 ; M1/70 133302 1:40  
 Biologend FITC anti-mouse CD11c Antibody N418 117306  
 Biologend FITC anti-mouse NK-1.1 Antibody PK136 108706  
 Biologend FITC anti-mouse CD5 53-7.3 100606  
 Biologend FITC anti-mouse FcεR1α Antibody MAR-1. 134306  
 Biologend FITC anti-mouse TCR β chain Antibody H57-597 109206  
 Biologend FITC anti-mouse TCR γ/δ GL3 118106  
 Thermo Fisher CD45.1 Monoclonal Antibody (A20), eFluor 450, eBioscience™ A20 48-0453-80 1:40  
 Thermo Fisher CD45.2 Monoclonal Antibody (104), APC-eFluor 780, eBioscience™ 104 47-0454-82 1:20  
 Biologend PerCP/Cyanine5.5 anti-mouse CD45.2 104 109828 1:50  
 Thermo Fisher CD90.2 (Thy-1.2) Monoclonal Antibody (53-2.1), eFluor 450 53-2.1 48-0902-82 1:50  
 Biologend PE/Cyanine7 anti-mouse CD127 (IL-7Rα) Antibody A7R34 135014 1:50  
 Biologend APC anti-mouse IL-33Rα (IL1RL1, ST2) 100 µg DIH9 145306 1:50  
 BD Biosciences PE anti-mouse SiglecF E502440 552126 1:50  
 Biologend APC anti-mouse Ly6G-Ly6C (GR1) RB6-8C5 108412 1:50  
 Thermo Fisher Ki-67 Monoclonal Antibody (SolA15), PE SolA15 12-5698-82 1:50  
 Thermo Fisher Anti-Hu/Mo Gata3 PE TWAJ 12-9966-42 1:20  
 Thermo Fisher ROR gamma (t) Monoclonal Antibody (B2D), PE, eBioscience™ B2D 12-6981-82 1:20  
 Biologend PE anti-T-bet Antibody 4B10 644810 1:20

Biolegend PE anti-mouse/human IL-5 TRFK5 504304 1:20  
 Thermo Fisher IL-17A Monoclonal Antibody (eBio17B7), eFluor 506 eBio17B7 69-7177-82 1:20  
 Biolegend APC/Cyanine7 anti-mouse IFN- $\gamma$  Antibody XMG1.2 505850 1:20  
 Thermo Fisher PE anti-mouse IL-13 eBio13A 12-7133-82 1:20

#### Human antibodies

Vendor Antibody Clone Catalog Number Dilution  
 Miltenyi FcR Blocking Reagent, human 130-059-901 1:50  
 Biolegend FITC anti-human CD3 Antibody UCHT1 300440  
 Biolegend FITC anti-human CD4 Antibody OKT4 317408  
 Biolegend FITC anti-human CD8a Antibody RPA-T8 301050  
 Biolegend FITC anti-human CD14 Antibody 63D3 367116  
 Biolegend FITC anti-human CD15 (SSEA-1) Antibody HI98 301904  
 Biolegend FITC anti-human CD16 Antibody 3G8 302006  
 Biolegend FITC anti-human CD19 Antibody HIB19 302206  
 Biolegend FITC anti-human CD20 Antibody 2H7 302304  
 Biolegend FITC anti-human CD33 Antibody HIM3-4 303304  
 Biolegend FITC anti-human CD34 Antibody 561 343604  
 Biolegend FITC anti-human CD203c (E-NPP3) Antibody NP4D6 324614  
 Biolegend FITC anti-human Fc $\epsilon$ R1 $\alpha$  Antibody AER-37 (CRA-1) 334608  
 Biolegend Brilliant Violet 650™ anti-human CD335 (NKp46) Antibody 9E2. 331927 1:50  
 Biolegend Brilliant Violet 421™ anti-human CD294 (CRTH2) Antibody BM16 350112 1:50  
 Biolegend PE/Cyanine5 anti-human CD117 (c-kit) Antibody A3C6E2 323412 1:25  
 Biolegend APC anti-human CD127 (IL-7R $\alpha$ ) Antibody A019D5 351316 1:50  
 Biolegend APC/Cyanine7 anti-human CD45 Antibody 2D1 368516 1:50

Validation

All antibodies were validated based on company website product data sheets

## Animals and other organisms

Policy information about [studies involving animals](#); [ARRIVE guidelines](#) recommended for reporting animal research

Laboratory animals

Strain/Source/Age/Sex  
 C57BL/6J (Wild-type) Jackson Labs 6-12 weeks Female mice were used in all experiments except 10-day Alternaria-challenge experiments (used both male and female mice)  
 Rbm3<sup>-/-</sup> from Peter Vanderklisch 6-12 weeks Female mice were used in all experiments except 10-day Alternaria-challenge experiments (used both male and female mice)  
 Tslpr<sup>-/-</sup> from Michael Croft 6-8 weeks Female mice  
 Rbm3<sup>-/-</sup>Rag2<sup>-/-</sup> Crossed in-house 6-15 weeks Male mice  
 Rag2<sup>-/-</sup> from Jackson Labs 6-15 weeks Male mice  
 Rbm3<sup>-/-</sup>Cysl1r1<sup>-/-</sup> Crossed in-house 8-10 weeks Female mice  
 Cysl1r1<sup>-/-</sup> from Jackson Labs 8-10 weeks Female mice  
 CD45.1+ Pep Boy Homo. Jackson Labs 18 weeks Female mice  
 CD45.1+CD45.2+ Pep Boy Het. Jackson Labs 18-20 weeks Female mice

Wild animals

No wild animals

Field-collected samples

No field collected samples

Ethics oversight

UCSD IACUC approved all studies

Note that full information on the approval of the study protocol must also be provided in the manuscript.

## Flow Cytometry

### Plots

Confirm that:

- The axis labels state the marker and fluorochrome used (e.g. CD4-FITC).
- The axis scales are clearly visible. Include numbers along axes only for bottom left plot of group (a 'group' is an analysis of identical markers).
- All plots are contour plots with outliers or pseudocolor plots.
- A numerical value for number of cells or percentage (with statistics) is provided.

### Methodology

Sample preparation

For surface stains, 1x10<sup>6</sup> lung and BAL cells were stained. For intracellular stains, 2 x 10<sup>6</sup> lung cells were stained. Fc receptors were first blocked for 5 minutes using CD16/CD32 (Biolegend, San Diego, CA). Eosinophils were identified as CD11cSiglec-F

+ and neutrophils were identified as SiglecFGR-1+; they were stained using CD45.2 (PerCP), Siglec-F (PE), GR-1(APC), and CD11c (FITC). ILCs were identified as LineageThy1.2+ lymphocytes or LineageT1ST2+ lymphocytes and were stained using CD45.2 (PerCP), Thy1.2 (APC), T1ST2 (PE), and a lineage cocktail. The lineage cocktail (FITC) consisted of the BioLegend Lineage cocktail (consists of CD3e, Ly-6G/Ly-6C, CD11b, CD45R/B220, and TER-119), CD11c, NK1.1, CD5, FcεR1, TCR $\alpha$ , and TCR $\gamma$  $\delta$ . The ILC subsets were stained with ST2 (APC) and CD127 (PE-Cy7). For nuclear intracellular staining, cells were permeabilized using the FoxP3 kit (ThermoFisher, Waltham, MA) after surface staining. Cells were stained with Ki-67 (PE or APC), RBM3, GATA3 (PE), and ID2 (PE).

For cytokine intracellular staining of lung cells in the 10-day challenge model, cells were cultured overnight with Golgi Plug (Fisher Scientific, Hampton, NH) at 500,000 cells per well. After surface staining for ILCs, cells were fixed and permeabilized using the BD fixation/permeabilization kit (BD Biosciences, La Jolla, CA) and stained for IL-5 (PE) or IL-13 (PE). For cytokine intracellular staining following the 7-day IL-33 and *Alternaria* challenge model, lung cells were cultured for 3 hours with cell stimulation cocktail (ThermoFisher, Waltham, MA) at 1x10<sup>6</sup> cells per well. After surface staining for ILCs, cells were fixed and permeabilized using the BD kit and stained for IL-5 (PE), IL-13 (PE), or IL17A (eFlour506). Lung cells stained for Bcl-2 expression were surfaced stained for ILCs, fixed and permeabilized with the BD kit, and stained with anti-Bcl-2 (PE-Cy7).

For human PBMC staining, ILC2s were sorted as LineageCRTH2+ lymphocytes. The lineage cocktail (FITC) consisted of antibodies for CD3, CD14, CD16, CD19, CD20, CD56, TCR $\gamma$  $\delta$ , CD4, CD11b, CD235a, and FcεR1. The polyclonal RBM3 antibody used in this study was raised in rabbits to the 14 c-terminal amino acids of RBM3, and affinity purified to the immunizing peptide. As described in prior work<sup>65, 66</sup>, the affinity purified anti-RBM3 antibody recognizes an ~17 kDa band corresponding to RBM3 on Western blots and selectively labels RBM3 in situ under a variety of fixation conditions. Flow Cytometry was performed using the BD Accuri for Fig. 1 and Supplementary Fig. 3b, otherwise Acea Novocyte was used. Data was analyzed using FlowJo software (Tree Star, Ashland, OR). All antibodies were from Biolegend, ThermoFisher, or BD Biosciences.

|                           |                                                                                                                                                                                                                                                                                                                                    |
|---------------------------|------------------------------------------------------------------------------------------------------------------------------------------------------------------------------------------------------------------------------------------------------------------------------------------------------------------------------------|
| Instrument                | Acea Novocyte and BD Accuri                                                                                                                                                                                                                                                                                                        |
| Software                  | Data was analyzed using FlowJo software (Tree Star, Ashland, OR).                                                                                                                                                                                                                                                                  |
| Cell population abundance | 1,000,000 cells per tube were collected.                                                                                                                                                                                                                                                                                           |
| Gating strategy           | All parent gating began with live gates, FSC/SSC, followed by either lymphocyte or granulocyte gates as shown in primary figures and supplemental methods. ILCs were then gated as lineage-negative thy1.2+. Human ILC2s gated the same but with final gate as CRTH2+. Sort purities were >99% as shown in Supplementary Figure 9. |

Tick this box to confirm that a figure exemplifying the gating strategy is provided in the Supplementary Information.
